# Supplementary material
Source: MDPI journal article supplement (https://www.mdpi.com/2073-4344/13/8/1228)
Supplement: s1 [file s1]

## Supporting information

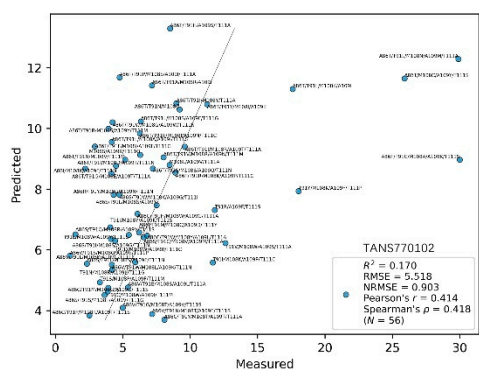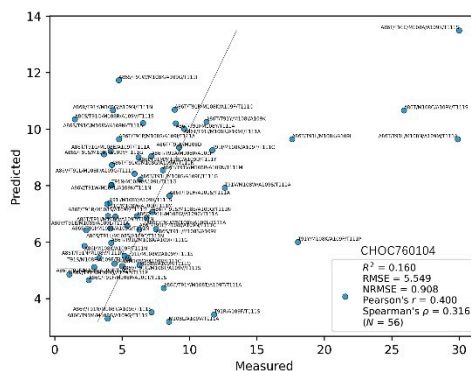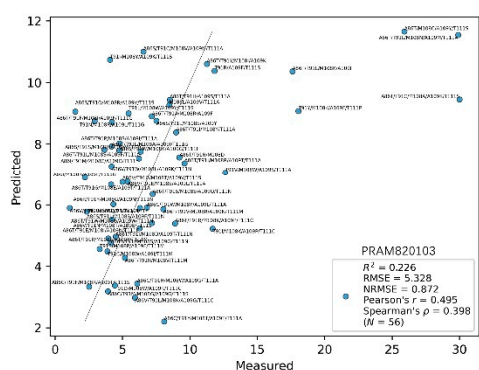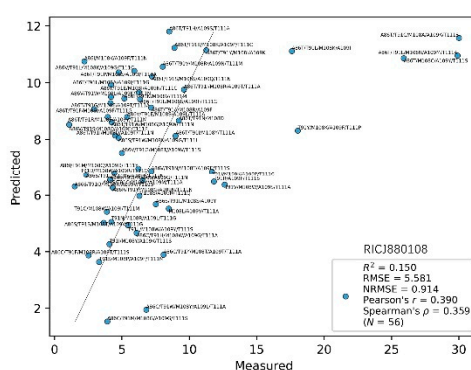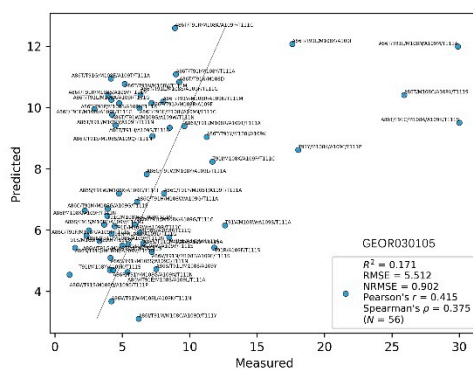

**Figure S1.** This set of figures is a fitting diagram generated by PyPEF. The Spearman coefficient of TANS770102 is 0.418, which proves that the evaluation of the five points using this model has a certain correlation.

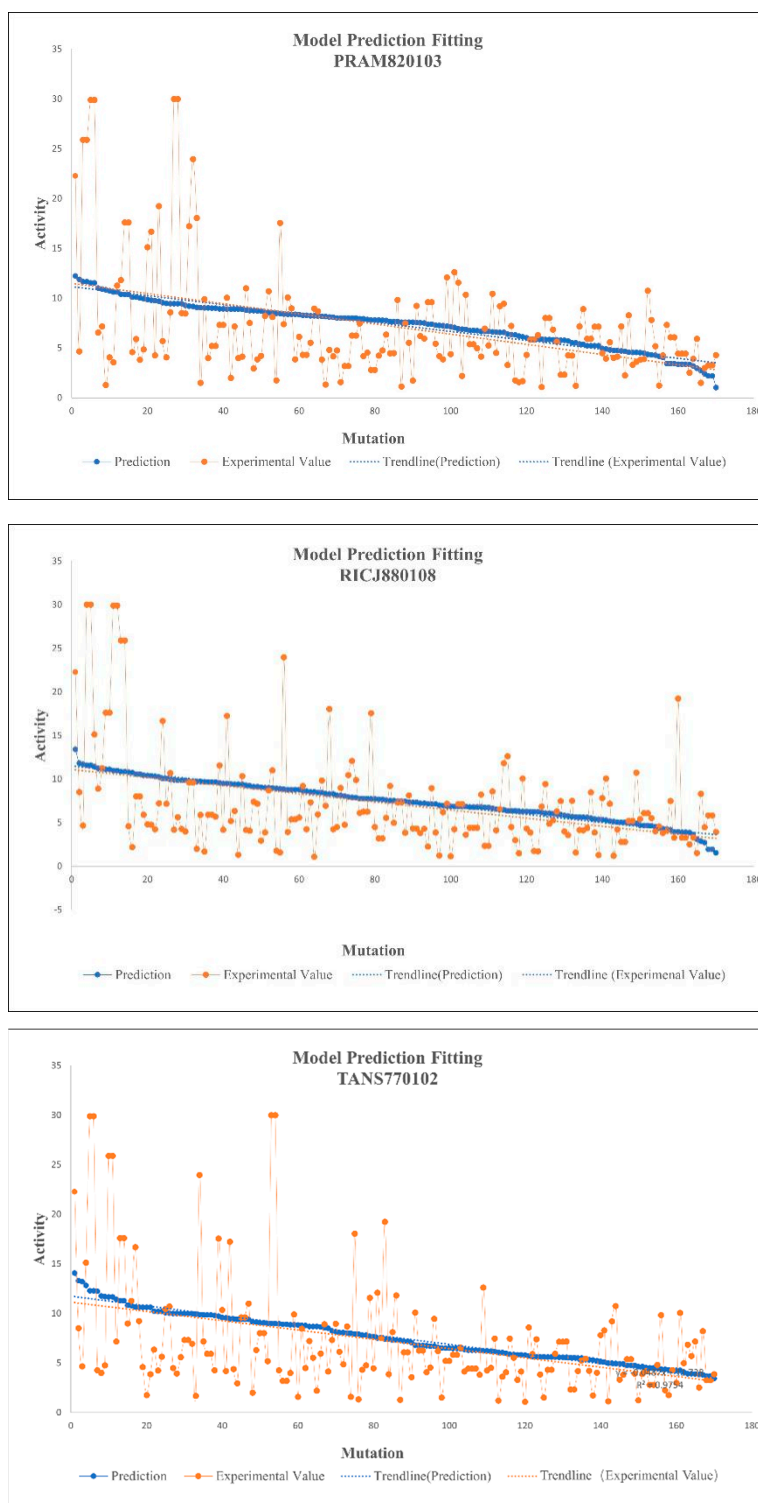

**Figure S2.** The above figure shows the fitting of 165 variants using three models. The three models meet the criteria for activity changes in trend. The yellow dashed line represents a trend composed of 165 variants, while the blue line represents the predicted results of the model. The two have unity.

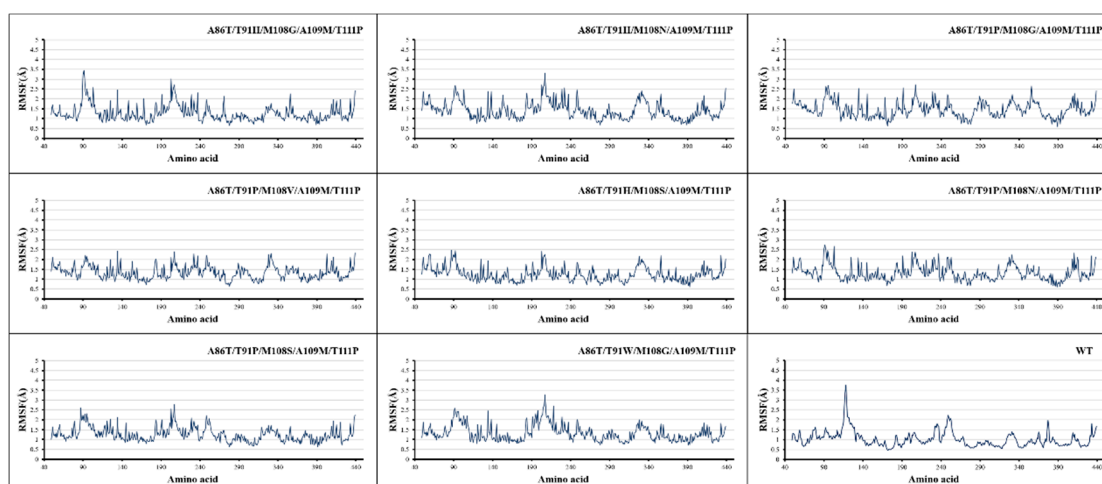

**Figure S3.** This image shows the positional changes of 8 variants of RMSF and wild-type RMSF. The peak of wild-type RMSF occurs at amino acids 90 to 140, which is consistent with the influence range of the five mutation sites.

**Table S1.** Abbreviation.

| Abbreviation | Full Name                              |
|--------------|----------------------------------------|
| AAindex      | Amino Acid Index                       |
| AI           | Artificial Intelligence                |
| DCA          | Direct coupling analysis               |
| MD           | Molecular Dynamics Simulation          |
| ML           | Machine Learning                       |
| MLP          | Multilayer Perceptron                  |
| OneHot       | One-hot Encoding                       |
| PLS          | Partial Least Squares                  |
| PyPEF        | Pythonic Protein Engineering Framework |
| RMSF         | Root Mean Square Fluctuation           |
| RF           | Random Forest                          |
| SVM          | Support Vector Machine                 |
| SVR          | Support Vector Regression              |

**Table S2.** This chart shows the RMSF of the Loop. The RMSF of the positions with the highest steric hindrance decreased. The overall RMSF of variants 05(A86T/T91P/M108V/A109M/T111P) and 07(A86T/T91H/M108S/A109M/T111P) showed a significant decrease. It can be inferred that the substrate throughput has been improved. The second variant could not be modeled because it was unstable.

| Amino Acid | WT   | 01   | 03   | 04   | 05   | 06   | 07   | 08   | 09   |
|------------|------|------|------|------|------|------|------|------|------|
| 77         | 1.47 | 1.02 | 1.55 | 1.4  | 1.37 | 1.45 | 1.49 | 1.14 | 1.26 |
| 78         | 1.5  | 1.11 | 1.5  | 1.39 | 1.63 | 1.5  | 1.45 | 1.58 | 1.4  |
| 79         | 1.63 | 1.74 | 2.06 | 2.02 | 1.96 | 2.15 | 1.64 | 1.92 | 1.69 |
| 80         | 1.29 | 1.45 | 1.67 | 1.64 | 1.43 | 1.55 | 1.44 | 1.34 | 1.41 |
| 81         | 1.04 | 0.93 | 1.47 | 1.24 | 1.21 | 1.29 | 1.32 | 1.07 | 1.18 |
| 82         | 1.08 | 0.86 | 1.29 | 1.1  | 1.04 | 1.16 | 1.02 | 1.03 | 1.13 |
| 83         | 1.07 | 1.01 | 1.18 | 1.09 | 0.94 | 1.27 | 0.86 | 1.19 | 1.24 |
| 84         | 1.21 | 1.18 | 1.35 | 1.27 | 1.2  | 1.37 | 1.11 | 1.29 | 1.39 |
| 85         | 1.01 | 1.29 | 1.47 | 1.31 | 1.26 | 1.45 | 1.19 | 1.37 | 1.4  |
| 86         | 1.08 | 1.34 | 1.19 | 1.11 | 1.04 | 1.85 | 0.95 | 1.71 | 1.48 |
| 87         | 1.1  | 1.77 | 1.48 | 1.32 | 1.27 | 2.47 | 1.22 | 2.61 | 1.99 |
| 88         | 1.15 | 1.61 | 1.84 | 1.45 | 1.69 | 1.92 | 1.72 | 1.98 | 1.63 |
| 89         | 1.11 | 2.03 | 1.91 | 1.89 | 1.59 | 2.13 | 1.66 | 2.02 | 2.08 |
| 90         | 1.15 | 3.21 | 1.94 | 2.01 | 1.63 | 2.25 | 2.47 | 2.23 | 2.08 |
| 91         | 1.41 | 3.44 | 2.6  | 2.15 | 1.77 | 2.09 | 2.74 | 1.94 | 2.59 |
| 92         | 1.61 | 3.01 | 2.68 | 2.63 | 2.03 | 2.45 | 2.55 | 2.27 | 2.46 |
| 93         | 1.44 | 2.39 | 2.31 | 2.47 | 2.22 | 1.97 | 2.29 | 2.29 | 2.3  |
| 94         | 1.34 | 2.17 | 2.18 | 2.21 | 1.88 | 1.48 | 1.92 | 1.88 | 2.14 |
| 95         | 1.39 | 2.5  | 2.36 | 2.68 | 2.15 | 1.79 | 2.46 | 2.3  | 2.44 |
| 105        | 1.23 | 1.71 | 1.64 | 1.86 | 1.7  | 1.16 | 1.6  | 1.49 | 2.04 |
| 106        | 1.17 | 1.25 | 1.43 | 1.44 | 1.23 | 1.03 | 1.24 | 1.17 | 1.57 |
| 107        | 1.48 | 1.25 | 1.46 | 1.68 | 1.52 | 1.24 | 1.36 | 1.28 | 2.2  |
| 108        | 1.27 | 1.25 | 1.56 | 2.33 | 1.49 | 1.37 | 1.15 | 1.09 | 1.73 |
| 109        | 1.15 | 1.25 | 1.26 | 1.66 | 1.75 | 1.3  | 1.18 | 1.32 | 1.63 |
| 110        | 1.27 | 1.28 | 1.48 | 1.46 | 1.22 | 1.09 | 1.17 | 1.45 | 1.44 |
| 111        | 1.09 | 0.94 | 0.89 | 0.84 | 1.1  | 0.91 | 0.86 | 1.12 | 0.87 |
| 112        | 1.32 | 1.33 | 1.25 | 1.07 | 1.16 | 1    | 0.93 | 1.41 | 0.91 |
| 113        | 1.54 | 1.14 | 0.95 | 1.12 | 0.98 | 1.43 | 0.92 | 1.2  | 1.35 |
| 114        | 1.67 | 0.88 | 1.01 | 1.37 | 1.03 | 1.15 | 0.96 | 1.39 | 1.18 |
| 115        | 1.87 | 0.8  | 0.96 | 1.02 | 0.92 | 0.87 | 0.86 | 1.12 | 0.85 |
| 116        | 2.64 | 1.01 | 1.21 | 1.38 | 1.02 | 0.98 | 0.95 | 1.29 | 1.05 |
| 117        | 3.35 | 1.44 | 1.03 | 1.62 | 1.3  | 1.04 | 1.18 | 1.64 | 1.23 |
| 118        | 3.76 | 1.44 | 1.18 | 1.77 | 1.23 | 1.28 | 1.24 | 1.72 | 1.3  |
| 119        | 3.06 | 1.07 | 1.03 | 1.34 | 1.14 | 1.07 | 1.08 | 1.42 | 1.11 |
| Mean value | 1.52 | 1.53 | 1.54 | 1.60 | 1.41 | 1.49 | 1.42 | 1.57 | 1.58 |
